# Supplementary material for: Machine Learning for Brain MRI Data Harmonisation: A Systematic Review
Source: MDPI journal article supplement (doi:10.3390/bioengineering10040397), 2023-03-23
Supplement: s1 [file s1]

**Table S1. Papers used explicit approach**

| Paper                        | Dataset and # of subjects                                | Specific Model           | Harmonized Domain                 | Evaluation                                                                              | Training data             | Validation Strategies                                  | Library              | Summary                                                                                                                                                                                                                       |
|------------------------------|----------------------------------------------------------|--------------------------|-----------------------------------|-----------------------------------------------------------------------------------------|---------------------------|--------------------------------------------------------|----------------------|-------------------------------------------------------------------------------------------------------------------------------------------------------------------------------------------------------------------------------|
| Garcia-Dias et al., 2020 [1] | 15,026 (public)                                          | Random forest regression | volumes (T1-w)                    | Group-wise: P-values                                                                    | 1D vector of 101 features | Leave-one-scanner-out CV                               | Sklearn              | A nonlinear regression model is trained, where the ground truth harmonized measures were estimated by ComBat harmonization methods [Codes are available].                                                                     |
| Dewey et al., 2019 [2]       | 12 (institutional, travelling)                           | CNN                      | intensity (T1-w, T2-w, PD, FLAIR) | Subject-wise: SSIM, AE, DSC, PVD and volume bias<br><br>Group-wise: p-value from t-test | 2D patches (128×128)      | six-fold CV                                            | Keras and Tensorflow | Model was trained using multi-contrast images to achieve site-to-site mapping. Final volumes are predicted in a 2.5D inference. The proposed method outperformed DL based latent space method and random forest-based method. |
| Tong et al., 2020 [3]        | 5 (travelling, institutional)<br>14 (travelling, public) | CNN                      | DKI measures: (DTI)               | Subject-wise: MSE<br><br>Group-wise: Coefficient of Variation                           | 3D patches (3×3×3)        | Leave-p-subjects-out CV<br><br>Leave-one-tissue-out CV | -                    | Train a CNN model with the DTI images from one scanner while eight DKI measures estimated from DTI images obtained from the reference scanner. The proposed model outperformed non-ML algorithms.                             |
| Koppers et al., 2019 [4]     | 10 (travelling, public)                                  | CNN                      | SH: (dMRI)                        | Subject-wise: MSE                                                                       | 3D patches (3×3×3)        | Ten-fold CV (8:2)                                      | -                    | Residual network was trained to learnt how to predict the SH coefficient and performance the mapping across two domains using the predicted SH features.                                                                      |

|                           |                         |                     |                                         |                                                                                                      |                                         |                                 |         |                                                                                                                                                                                                                                              |
|---------------------------|-------------------------|---------------------|-----------------------------------------|------------------------------------------------------------------------------------------------------|-----------------------------------------|---------------------------------|---------|----------------------------------------------------------------------------------------------------------------------------------------------------------------------------------------------------------------------------------------------|
| St-Jean et al., 2020 [5]  | 14 (travelling, public) | SDL                 | Raw signals (dMRI)                      | Subject-wise: MNE, error and % of difference<br><br>Group-wise: Hedges'g for t-test, KL divergence   | 3D patches ( $3 \times 3 \times 3$ )    | three-fold CV, AIC minimisation | Sklearn | Apply mapping between scanners for matched acquisition protocols and then map the original and altered data sets toward a common harmonisation space which is created by randomly sampling data sets from all scanners [codes are available] |
| Zhao et al., 2019 [6]     | 263 (public)            | GAN                 | cortical thickness maps (T1-w and T2-w) | Subject-wise: MAE, PSNR, Euclidean distances between any two scans<br><br>Group-wise: PCA, Cohen's d | 2D cortical thickness map               | Split dataset                   | -       | GANs was trained to learn a site-to-site mapping. The proposed method was validated on both synthetic paired data and real unpaired data, where synthetic paired dataset was created by resampling.                                          |
| Ren et al., 2021 [7]      | 246 (public)            | GAN                 | intensity (T1-w, FLAIR)                 | Downstream task: Segmentation accuracy                                                               | 2D patches ( $256 \times 256$ )         | leave-one-subject-out CV        | PyTorch | By incorporating segmentation networks, GAN was trained and encouraged to produce the same segmentation via a segmentation-objective. The proposed method was compared and outperformed GAN-based methods [codes are available]              |
| Robinson et al., 2020 [8] | 1254 (public)           | Transformer network | intensity (T1-w)                        | Downstream tasks: sex classification, age prediction                                                 | 3D patches ( $64 \times 64 \times 64$ ) | Split dataset                   | PyTorch | An image-and-spatial transformer network were trained to achieve site-to-site mapping. The proposed method was outperformed the GAN method. [codes are available]                                                                            |

|                        |                                                           |              |                                             |                                                                                                                                      |                                 |               |         |                                                                                                                                                                                   |
|------------------------|-----------------------------------------------------------|--------------|---------------------------------------------|--------------------------------------------------------------------------------------------------------------------------------------|---------------------------------|---------------|---------|-----------------------------------------------------------------------------------------------------------------------------------------------------------------------------------|
| Dewey et al., 2020 [9] | 140 (institutional)<br><br>10 (travelling, institutional) | Auto-encoder | intensity (T1-w, T2-w)                      | Subject-wise: SSIM and PSNR                                                                                                          | 2D patches ( $224 \times 192$ ) | Split dataset | -       | An auto-encoder is trained using paired T1-w and T2-w images from same subjects. Model's parameters were searched using grid search.                                              |
| Zuo et al., 2021 [10]  | 120 (institutional)<br><br>7 (travelling, institutional)  | Auto-encoder | intensity (T1-w, T2-w)                      | Subject-wise: SSIM and PSNR                                                                                                          | 2D patches ( $224 \times 192$ ) | Split dataset | PyTorch | Paired T1-w and T2-w from multiple sites were used to train the model. The proposed method outperform the histogram matching, GANs and the method presented in [9].               |
| Zuo et al., 2021 [11]  | 20 (travelling, institutional)<br><br>100 (public)        | Auto-encoder | intensity (T1-w, T2-w)                      | Subject-wise: SSIM, PSNR, DSC and PVD                                                                                                | 2D patches ( $224 \times 224$ ) | Split dataset | PyTorch | The model was developed based on [9], [10]. The author proposed a 2.5D inference to produce the final volume. [codes are available]                                               |
| Gao et al., 2019 [12]  | 489 (institutional)<br><br>10 (travelling, institutional) | GAN          | Image-level features: intensity of T2-FLAIR | Subject-wise: PSNR, histogram correlation, SSIM, MSD, MSE and average disparity<br><br>Downstream tasks: classification of diagnosis | 2D slices ( $256 \times 256$ )  | Split dataset | -       | Multiple generators and discriminators were used for each sites or site combinations to achieve the many-to-one mapping. The proposed method outperformed the histogram matching. |
| Liu et al., 2021 [13]  | 1 (travelling, public)<br><br>718 (public)                | GAN          | intensity (T1-w)                            | Subject-wise: DSC, SSIM, Euclidean distances between any two scans                                                                   | 2D slices ( $128 \times 128$ )  | Split dataset | -       | Mapping across domains utilises a style-encoder to learn the scanner-invariant style code in images.                                                                              |

|                            |                                |              |                       |                                                                         |                                         |                                    |                      |                                                                                                                                                                                                                |
|----------------------------|--------------------------------|--------------|-----------------------|-------------------------------------------------------------------------|-----------------------------------------|------------------------------------|----------------------|----------------------------------------------------------------------------------------------------------------------------------------------------------------------------------------------------------------|
|                            |                                |              |                       |                                                                         |                                         |                                    |                      |                                                                                                                                                                                                                |
| Weninger et al., 2022 [14] | 161 (travelling, public)       | GAN          | SH (dMRI)             | Subject-wise: MSE                                                       | 3D patches ( $40 \times 40 \times 40$ ) | Split dataset                      | PyTorch              | Travelling subject dataset which contains scans from 3T and 7T scanner were used. The results of supervised, unsupervised, and mixed training were compared.                                                   |
| Torbati et al., 2021 [15]  | 18 (travelling, institutional) | Auto-encoder | intensity (T1-w)      | Subject-wise: SSIM, SD, MSE, MAD                                        | 2D slices                               | Train and test on the same dataset | Tensorflow and keras | The model was trained to first learn the embeddings with structural information and then harmonise based on the embeddings. The proposed method was outperformed the statistical methods [codes are available] |
| Tian et al., 2022 [16]     | 9 (travelling, public)         | Auto-encoder | GM volume maps (T1-w) | Group-wise: p-value for ANOVA and spearman's correlation, KL divergence | 2D slices (176×208)                     | Leave-one-subject-out CV           | Tensorflow and keras | The autoencoder was trained and evaluated with traveling subject datasets. 2.5D interface was developed. The proposed model outperformed statistical harmonization methods [codes are available].              |
| Fatania et al., 2022 [17]  | 310 (public)                   | Auto-encoder | Intensities (T1-w)    | Group-wise: p-value for KS and t-test                                   | 2D slices                               | Split dataset                      | TensorFlow           | The proposed model consists of an auto-encoder based on site-to-site translation. The experiment was tested on data from unseen                                                                                |

|                         |                         |              |                               |                                                                                                                          |                                           |               |   |                                                                                                                                                                                                                              |
|-------------------------|-------------------------|--------------|-------------------------------|--------------------------------------------------------------------------------------------------------------------------|-------------------------------------------|---------------|---|------------------------------------------------------------------------------------------------------------------------------------------------------------------------------------------------------------------------------|
|                         |                         |              |                               |                                                                                                                          |                                           |               |   | scanners and outperformed statistical methods.                                                                                                                                                                               |
| Arai et al., 2021 [18]  | 616 (public)            | GAN          | Intensities (T1-w)            | Subject-wise: PSNR, MSE, SSIM<br><br>Group-wise: t-SNE for cluster visualisation<br><br>Downstream tasks: classification | 3D volume ( $160 \times 160 \times 192$ ) | 5-fold CV     | - | The proposed method used GAN model to achieve one-to-one mapping, aim with obtaining a scanner independent low-dimensional representation while preserving disease-related anatomical features.                              |
| Zhong et al., 2020 [19] | 84 (institutional)      | GAN          | DTI-derived metric map (dMRI) | Subject-wise: AE, MSE<br><br>Group-wise: Cohen's d, p-value for U test, Pearson correlation                              | 3D patches ( $30 \times 30 \times 8$ )    | Six-fold CV   | - | Dual GANs was trained to learn the mappings of DTI-derived metrics of age-matched neonates from two sites. The proposed approach outperformed the statistics method.                                                         |
| Moyer et al., 2020 [20] | 15 (travelling; public) | Auto-encoder | SH (dMRI)                     | Subject wise: MSE<br><br>Group-wise: APE and Coefficient of Variation                                                    | 1D vector of DWI signal                   | Split dataset | - | All scans were masked for WM tissue before converting them to the SH representation. Results for single and multiple sites mappings were compared and results showed that they outperformed to the method presented in [21]. |

**Table S2. Papers used implicit approach**

| Paper                           | Dataset       | Specific Techniques           | Modality           | Evaluation                                                                                        | Training input                              | Validation Strategies | Software | Summary                                                                                                                                                                                             |
|---------------------------------|---------------|-------------------------------|--------------------|---------------------------------------------------------------------------------------------------|---------------------------------------------|-----------------------|----------|-----------------------------------------------------------------------------------------------------------------------------------------------------------------------------------------------------|
| Guan et al., 2021 [22]          | 2572 (public) | Adversarial transfer learning | T1-w: intensities  | Group-wise: visualization using t-SNE<br><br>Classification (downstream tasks)                    | 3D, raw intensities                         | 5-fold CV             | PyTorch  | The proposed DA technique uses an attention discovery module to locate disease-related regions in brain MRIs.                                                                                       |
| Dinsdale et al., 2021 [23]      | 8417 (public) | Adversarial transfer learning | T1-w: intensities  | Group-wise: visualization using t-SNE<br><br>Downstream tasks: Segmentation, Brain age regression | 2D patches of size $128 \times 128$         | 5-fold CV             | PyTorch  | Adapt an iterative update approach to the adversarial learning [codes are available].                                                                                                               |
| Orbes-Arteaga et al., 2019 [24] | 133 (public)  | Adversarial transfer learning | FLAIR: intensities | Downstream tasks: Segmentation                                                                    | 2D slices of size $256 \times 256$          | Split dataset         | -        | The proposed method combines data augmentation strategy and adversarial networks to improve the main task performance.                                                                              |
| Ackaouy et al., 2020 [25]       | 53 (public)   | Adversarial transfer learning | FLAIR: intensities | Downstream tasks: Segmentation                                                                    | 3D patches of size $16 \times 16 \times 16$ | Split dataset         | Keras    | The proposed method is based on the Optimal Transport, which learns a shared embedding for the source and target domains while preserving the discriminative information used by the discriminator. |

|                                |               |                               |                               |                                  |                                                            |                          |         |                                                                                                                                                                                                             |
|--------------------------------|---------------|-------------------------------|-------------------------------|----------------------------------|------------------------------------------------------------|--------------------------|---------|-------------------------------------------------------------------------------------------------------------------------------------------------------------------------------------------------------------|
| Zhang et al., 2019 [26]        | 1506 (public) | Adversarial transfer learning | T1-w: intensities             | Downstream tasks: Classification | 2D slices of size $256 \times 256$                         | 2-fold CV                | PyTorch | The model utilizes a cycle feature adaptation module to harmonize features.                                                                                                                                 |
| Yousefnezhad et al., 2020 [27] | 142 (public)  | Feature extraction            | fMRI: time-series raw signals | Downstream tasks: Classification | 2D time-series raw signals (1D flatten voxel)              | Leave-one-subject out CV | PyTorch | First extracts a set of common features for all subjects in each site, and then then maps these site-specific features to a global shared space.                                                            |
| Wang et al., 2020 [28]         | 468 (public)  | Feature extraction            | fMRI: functional connectivity | Downstream tasks: Classification | 2D functional connectivity matrix of size $116 \times 116$ | 5-fold CV                | -       | The proposed method treats one site as a target domain and the remaining sites as source domains. Transform the source domains to a common space using low-rank representation.                             |
| Wang et al., 2022 [29]         | 609 (public)  | Feature extraction            | fMRI: functional connectivity | Downstream tasks: Classification | 2D functional connectivity matrix of size $64 \times 64$   | leave-one-out CV         | -       | Use a nested singular value decomposition method to mitigate inter-site heterogeneity and extract features by learning both local cluster-shared features across sites and global category-shared features. |
| Delisle et al., 2021 [30]      | 1118 (pubic)  | Adversarial transfer learning | T1-w, T2: intensities         | Downstream tasks: Segmentation   | 3D patches of size $32 \times 32 \times 32$                | Split dataset            | PyTorch | The overall architecture consists of a generator, a segmenter that outputs a segmentation map from output of the generator and a discriminator [codes are available].                                       |

|                                 |                     |                               |                                                |                                        |                                                                  |                  |                      |                                                                                                                                                                                                                                      |
|---------------------------------|---------------------|-------------------------------|------------------------------------------------|----------------------------------------|------------------------------------------------------------------|------------------|----------------------|--------------------------------------------------------------------------------------------------------------------------------------------------------------------------------------------------------------------------------------|
| Huang et al., 2020 [31]         | 973 (public)        | Adversarial transfer learning | fMRI: connectome-based features                | Downstream tasks: Classification       | 1D vector of connectome-based features                           | 10-fold CV       | -                    | The classification network with adversarial module was trained on source domains and then tested on another unlabelled target domain.                                                                                                |
| C. Monte-Rubio et al. [32]      | 303 (institutional) | Fine-tuning                   | T1-w: segmentation map                         | Downstream tasks: Classification       | 2D voxel wise segmented data of GM and WM                        | Leave-one-out CV | R package            | Train a Gaussian process site classifier to estimate the harmonisation parameters. Then encode the parameters for the main classifier.                                                                                               |
| Chen et al., 2020 [33]          | 1380 (public)       | Fine-tuning                   | Diffusion MRI: tract-specific analysis results | Downstream tasks: Brain age regression | 3D image-feature data with size of $100 \times 76 \times 9$      | 10-fold CV       | MATLAB               | Use model constructed with a large dMRI dataset as the source domain, and then transfer it to three target domains with distinct acquisition scenarios [codes are available].                                                        |
| Wachinger and Reuter, 2016 [34] | 1350 (public)       | Fine-tuning                   | T1-w: image-features                           | Downstream tasks: Classification       | 1D vector of cortical thickness, brain volume and shape features | Split dataset    | R package            | The DA technique based on the fine-tuning via instance weighting was used to transfer between the classifier on two databases.                                                                                                       |
| Ghafoorian et al., 2017 [35]    | 439 (public)        | Fine-tuning                   | T1-w, FLAIR: intensities                       | Downstream tasks: Segmentation         | 2D patches of size $32 \times 32$                                | Split dataset    | -                    | The DA technique based on fine-tuning was used to transfer the original to the follow-up scan domain due to a change of scanner parameters. The same segmentation annotations were used for both domain during training and testing. |
| Balboni et al., 2022 [36]       | 73 (institutional)  | Fine-tuning                   | T1-w: intensities                              | Downstream tasks: Segmentation         | 3D patches of size of $32 \times 64 \times 64$                   | Split dataset    | Tensorflow and keras | This study fine-tunes the network trained in a previous study using ADNI datasets to segment scans in                                                                                                                                |



|                               |               |             |                                |                                                                               |                                                          |                                                      |         |                                                                                                                                                                                           |
|-------------------------------|---------------|-------------|--------------------------------|-------------------------------------------------------------------------------|----------------------------------------------------------|------------------------------------------------------|---------|-------------------------------------------------------------------------------------------------------------------------------------------------------------------------------------------|
|                               |               |             |                                |                                                                               |                                                          |                                                      |         | three new datasets [codes are available].                                                                                                                                                 |
| Shi et al., 2021 [37]         | 343 (public)  | Fine-tuning | fMRI: functional connectivity  | Downstream tasks: Classification                                              | 2D functional connectivity matrix of size $90 \times 90$ | Five-fold CV                                         | -       | The DA method is based on a three-way decision model based on triangular fuzzy similarity and divide the objects in the target domain with coarse granularity.                            |
| van Opbroek et al., 2015 [38] | 56 (public)   | Fine-tuning | T1, T2, and FLAIR: intensities | Downstream tasks: Segmentation                                                | 2D voxel-wise data                                       | CV                                                   | -       | Perform regions and lesion segmentation using transfer learning considering unbalance training data.                                                                                      |
| Wang et al., 2022 [39]        | 2641 (public) | Fine-tuning | T1-w: intensities              | Group-wise: visualization using t-SNE<br><br>Downstream tasks: Classification | 3D volume of size $193 \times 229 \times 193$            | 5-fold CV                                            | PyTorch | Introduce a regularization term in fine-tuning process of domain adaptation for diverse population and imaging devices.                                                                   |
| Shi et al., 2022 [40]         | 452 (public)  | Fine-tuning | fMRI: functional connectivity  | Downstream tasks: Classification                                              | 1D voxel wise vector                                     | Split dataset                                        | -       | Estimate the weight coefficient of each source domain to accurately describe the importance. And then adjust the sampling weights for the main network, using optimal transport theory.   |
| Opbroek et al., 2015 [41]     | 61 (public)   | Fine-tuning | T1-w: intensity                | Downstream tasks: Segmentation                                                | 2D images                                                | Leave-one-domain-out/<br>Leave-one-subject-out<br>CV | LIBSVM  | Estimate a weight to each image based on the distribution of its voxels in the feature space. The voxels and weights of the training images are then used to train a weighted classifier. |

|                      |              |                     |                   |                                   |                    |           |   |                                                                                 |
|----------------------|--------------|---------------------|-------------------|-----------------------------------|--------------------|-----------|---|---------------------------------------------------------------------------------|
| Ma et al., 2018 [42] | 300 (public) | Multi-task learning | T1-w: intensities | downstream tasks : Classification | 1D voxel-wise data | 5-fold CV | - | The proposed method performed multi-task learning for multi-site data learning. |
|----------------------|--------------|---------------------|-------------------|-----------------------------------|--------------------|-----------|---|---------------------------------------------------------------------------------|

1D: one dimensional

2.5D: pseudo three dimensional

2D: two dimensional

3D: three dimensional

ADL: adaptive dictionary learning

AE: Absolute error

AIC: Akaike information criterion

APE: Absolute Percentage Error

CNN: Convolutional neural network

CV: cross validation

DA: domain adaptation

DKI: diffusion kurtosis imaging

DSC: Dice similarity coefficient

GAN: Generative Adversarial Networks

KL: Kullback–Leibler

KS: Kolmogorov–Smirnov

MAD: Mean absolute deviation

MAE: mean solute error

MD: mean diffusivity

MNE: mean normalized error

MSD: Mean squared deviation

MSE: root mean square error

PSNR: peak-signal-to-noise ratio

PVD: percent volume difference

ROI: region of interest

SDL: spare dictionary learning

SH: spherical harmonic

SSIM: structural similarity index measure

**Table S3: Quality Assessment of All Included Articles**

|      | Q1  | Q2 | Q3  | Q4  | Q5  | Q6  | Q7  | Q8 | Q9 | Q10 | Score |
|------|-----|----|-----|-----|-----|-----|-----|----|----|-----|-------|
| [11] | 1   | 1  | 1   | 1   | 1   | 1   | 1   | 1  | 1  | 1   | 10    |
| [22] | 1   | 1  | 1   | 1   | 1   | 1   | 1   | 1  | 1  | 1   | 10    |
| [42] | 1   | 1  | 1   | 1   | 1   | 1   | 1   | 1  | 1  | 0.5 | 9.5   |
| [33] | 1   | 1  | 1   | 1   | 1   | 1   | 1   | 1  | 0  | 1   | 9     |
| [2]  | 1   | 1  | 1   | 1   | 1   | 1   | 1   | 0  | 1  | 1   | 9     |
| [10] | 1   | 1  | 1   | 1   | 1   | 0.5 | 1   | 1  | 1  | 0.5 | 9     |
| [16] | 1   | 1  | 1   | 1   | 1   | 1   | 1   | 1  | 0  | 1   | 9     |
| [20] | 1   | 1  | 1   | 1   | 1   | 1   | 1   | 0  | 1  | 1   | 9     |
| [28] | 1   | 1  | 1   | 1   | 1   | 1   | 1   | 1  | 1  | 1   | 9     |
| [29] | 1   | 1  | 1   | 1   | 1   | 1   | 1   | 1  | 1  | 1   | 9     |
| [30] | 1   | 1  | 1   | 1   | 1   | 1   | 1   | 1  | 0  | 1   | 9     |
| [32] | 1   | 1  | 1   | 1   | 1   | 1   | 1   | 1  | 0  | 1   | 9     |
| [39] | 1   | 1  | 1   | 1   | 1   | 1   | 1   | 0  | 1  | 1   | 9     |
| [40] | 1   | 1  | 1   | 1   | 1   | 0.5 | 1   | 1  | 1  | 0.5 | 9     |
| [5]  | 1   | 1  | 1   | 1   | 1   | 1   | 0.5 | 0  | 1  | 1   | 8.5   |
| [7]  | 1   | 1  | 1   | 0.5 | 1   | 1   | 1   | 0  | 1  | 1   | 8.5   |
| [12] | 1   | 1  | 1   | 1   | 1   | 1   | 1   | 1  | 0  | 0.5 | 8.5   |
| [34] | 1   | 1  | 1   | 1   | 1   | 1   | 1   | 1  | 0  | 0.5 | 8.5   |
| [38] | 1   | 1  | 0   | 1   | 1   | 1   | 1   | 1  | 0  | 1   | 8     |
| [1]  | 1   | 1  | 1   | 1   | 1   | 1   | 1   | 0  | 0  | 1   | 8     |
| [15] | 1   | 1  | 1   | 1   | 1   | 1   | 1   | 1  | 0  | 0.5 | 8     |
| [18] | 1   | 1  | 1   | 1   | 1   | 1   | 1   | 0  | 0  | 1   | 8     |
| [19] | 1   | 1  | 1   | 0.5 | 1   | 1   | 0.5 | 1  | 0  | 1   | 8     |
| [35] | 1   | 1  | 1   | 1   | 1   | 1   | 1   | 0  | 0  | 1   | 8     |
| [23] | 1   | 1  | 0.5 | 1   | 1   | 1   | 1   | 0  | 0  | 1   | 7.5   |
| [3]  | 1   | 1  | 1   | 0   | 1   | 0.5 | 1   | 1  | 0  | 1   | 7.5   |
| [13] | 1   | 1  | 1   | 1   | 1   | 1   | 1   | 0  | 0  | 0.5 | 7.5   |
| [17] | 1   | 1  | 0.5 | 0.5 | 1   | 1   | 0.5 | 1  | 0  | 1   | 7.5   |
| [24] | 1   | 1  | 0.5 | 1   | 0.5 | 1   | 0.5 | 1  | 1  | 0   | 7.5   |
| [26] | 1   | 1  | 1   | 1   | 1   | 0.5 | 0.5 | 0  | 1  | 0.5 | 7.5   |
| [27] | 1   | 1  | 1   | 0.5 | 0.5 | 0.5 | 1   | 1  | 1  | 0   | 7.5   |
| [31] | 1   | 1  | 1   | 1   | 0.5 | 0.5 | 0.5 | 1  | 1  | 0   | 7.5   |
| [37] | 1   | 1  | 1   | 0.5 | 0.5 | 1   | 1   | 0  | 1  | 0.5 | 7.5   |
| [4]  | 0.5 | 1  | 1   | 1   | 1   | 1   | 0.5 | 0  | 1  | 0   | 7     |
| [25] | 1   | 1  | 1   | 1   | 1   | 1   | 0.5 | 0  | 0  | 0.5 | 7     |

|         |      |      |      |      |      |      |      |      |       |      |      |
|---------|------|------|------|------|------|------|------|------|-------|------|------|
| [36]    | 1    | 1    | 1    | 1    | 1    | 1    | 0.5  | 0    | 0     | 0.5  | 7    |
| [41]    | 1    | 1    | 1    | 0.5  | 1    | 0.5  | 1    | 0    | 0     | 1    | 7    |
| [14]    | 1    | 0.5  | 1    | 1    | 1    | 1    | 0.5  | 0    | 0     | 0.5  | 6.5  |
| [8]     | 1    | 1    | 0.5  | 0.5  | 1    | 0.5  | 0.5  | 0    | 1     | 0    | 6    |
| [6]     | 0.5  | 1    | 0.5  | 0.5  | 1    | 1    | 1    | 0    | 0     | 0    | 5.5  |
| Average | 0.98 | 0.99 | 0.91 | 0.85 | 0.95 | 0.90 | 0.86 | 0.53 | 0.475 | 0.70 | 8.16 |

**Sub-Table of S3 (S3-1): Quality assessment of all articles that used explicit approaches**

|      | Q1 | Q2 | Q3 | Q4  | Q5 | Q6  | Q7  | Q8 | Q9 | Q10 | Score |
|------|----|----|----|-----|----|-----|-----|----|----|-----|-------|
| [11] | 1  | 1  | 1  | 1   | 1  | 1   | 1   | 1  | 1  | 1   | 10    |
| [2]  | 1  | 1  | 1  | 1   | 1  | 1   | 1   | 0  | 1  | 1   | 9     |
| [10] | 1  | 1  | 1  | 1   | 1  | 0.5 | 1   | 1  | 1  | 0.5 | 9     |
| [16] | 1  | 1  | 1  | 1   | 1  | 1   | 1   | 1  | 0  | 1   | 9     |
| [20] | 1  | 1  | 1  | 1   | 1  | 1   | 1   | 0  | 1  | 1   | 9     |
| [5]  | 1  | 1  | 1  | 1   | 1  | 1   | 0.5 | 0  | 1  | 1   | 8.5   |
| [7]  | 1  | 1  | 1  | 0.5 | 1  | 1   | 1   | 0  | 1  | 1   | 8.5   |
| [12] | 1  | 1  | 1  | 1   | 1  | 1   | 1   | 1  | 0  | 0.5 | 8.5   |
| [1]  | 1  | 1  | 1  | 1   | 1  | 1   | 1   | 0  | 0  | 1   | 8     |
| [15] | 1  | 1  | 1  | 1   | 1  | 1   | 1   | 1  | 0  | 0.5 | 8     |
| [18] | 1  | 1  | 1  | 1   | 1  | 1   | 1   | 0  | 0  | 1   | 8     |
| [19] | 1  | 1  | 1  | 0.5 | 1  | 1   | 0.5 | 1  | 0  | 1   | 8     |
| [3]  | 1  | 1  | 1  | 0   | 1  | 0.5 | 1   | 1  | 0  | 1   | 7.5   |
| [13] | 1  | 1  | 1  | 1   | 1  | 1   | 1   | 0  | 0  | 0.5 | 7.5   |

|       |      |      |      |      |      |      |      |      |      |      |      |
|-------|------|------|------|------|------|------|------|------|------|------|------|
| [17]  | 1    | 1    | 0.5  | 0.5  | 1    | 1    | 0.5  | 1    | 0    | 1    | 7.5  |
| [4]   | 0.5  | 1    | 1    | 1    | 1    | 1    | 0.5  | 0    | 1    | 0    | 7    |
| [9]   | 1    | 1    | 1    | 0    | 1    | 1    | 1    | 0    | 0    | 0.5  | 6.5  |
| [14]  | 1    | 0.5  | 1    | 1    | 1    | 1    | 0.5  | 0    | 0    | 0.5  | 6.5  |
| [8]   | 1    | 1    | 0.5  | 0.5  | 1    | 0.5  | 0.5  | 0    | 1    | 0    | 6    |
| [6]   | 0.5  | 1    | 0.5  | 0.5  | 1    | 1    | 1    | 0    | 0    | 0    | 5.5  |
| Total | 0.95 | 0.98 | 0.93 | 0.78 | 1.00 | 0.93 | 0.85 | 0.40 | 0.40 | 0.70 | 7.88 |

**Sub-Table of S3 (S3-2): Quality assessment of all articles that used implicit approaches**

|      | Q1 | Q2 | Q3  | Q4 | Q5 | Q6  | Q7 | Q8 | Q9 | Q10 | Score |
|------|----|----|-----|----|----|-----|----|----|----|-----|-------|
| [22] | 1  | 1  | 1   | 1  | 1  | 1   | 1  | 1  | 1  | 1   | 10    |
| [33] | 1  | 1  | 1   | 1  | 1  | 1   | 1  | 1  | 0  | 1   | 9     |
| [42] | 1  | 1  | 1   | 1  | 1  | 1   | 1  | 1  | 1  | 0.5 | 9.5   |
| [28] | 1  | 1  | 1   | 1  | 1  | 1   | 1  | 1  | 1  | 1   | 9     |
| [29] | 1  | 1  | 1   | 1  | 1  | 1   | 1  | 1  | 1  | 1   | 9     |
| [30] | 1  | 1  | 1   | 1  | 1  | 1   | 1  | 1  | 0  | 1   | 9     |
| [32] | 1  | 1  | 1   | 1  | 1  | 1   | 1  | 1  | 0  | 1   | 9     |
| [38] | 1  | 1  | 0   | 1  | 1  | 1   | 1  | 1  | 0  | 1   | 8     |
| [39] | 1  | 1  | 1   | 1  | 1  | 1   | 1  | 0  | 1  | 1   | 9     |
| [40] | 1  | 1  | 1   | 1  | 1  | 0.5 | 1  | 1  | 1  | 0.5 | 9     |
| [23] | 1  | 1  | 0.5 | 1  | 1  | 1   | 1  | 0  | 0  | 1   | 7.5   |

|       |      |      |      |      |      |      |      |      |      |      |     |
|-------|------|------|------|------|------|------|------|------|------|------|-----|
| [34]  | 1    | 1    | 1    | 1    | 1    | 1    | 1    | 1    | 0    | 0.5  | 8.5 |
| [35]  | 1    | 1    | 1    | 1    | 1    | 1    | 1    | 0    | 0    | 1    | 8   |
| [36]  | 1    | 1    | 1    | 1    | 1    | 1    | 0.5  | 0    | 0    | 0.5  | 7   |
| [41]  | 1    | 1    | 1    | 0.5  | 1    | 0.5  | 1    | 0    | 0    | 1    | 7   |
| [24]  | 1    | 1    | 0.5  | 1    | 0.5  | 1    | 0.5  | 1    | 1    | 0    | 7.5 |
| [26]  | 1    | 1    | 1    | 1    | 1    | 0.5  | 0.5  | 0    | 1    | 0.5  | 7.5 |
| [27]  | 1    | 1    | 1    | 0.5  | 0.5  | 0.5  | 1    | 1    | 1    | 0    | 7.5 |
| [31]  | 1    | 1    | 1    | 1    | 0.5  | 0.5  | 0.5  | 1    | 1    | 0    | 7.5 |
| [37]  | 1    | 1    | 1    | 0.5  | 0.5  | 1    | 1    | 0    | 1    | 0.5  | 7.5 |
| [25]  | 1    | 1    | 1    | 1    | 1    | 1    | 0.5  | 0    | 0    | 0.5  | 7   |
| Total | 1.00 | 1.00 | 0.90 | 0.93 | 0.90 | 0.88 | 0.88 | 0.62 | 0.52 | 0.69 | 8.3 |

1 = “yes”, 0.5 = “partial”, 0 = “no”.

Q1: Are the research aims clearly defined?

Q2: Is the data collection procedure or the datasets clearly defined?

Q3: Is the data pre-processing procedure clearly defined?

Q4: Is the characteristics of the input data clearly described?

Q5: Are the ML techniques well defined?

Q6: Is the training procedure clearly defined?

Q7: Are the results and findings clearly stated?

Q8: Are there any comparative analyses (statistical vs ML)?

Q9: Are there any comparative analyses (ML vs ML)?

Q10: Are the limitations of the study specified?

## References

- [1] R. Garcia-Dias *et al.*, “Neuroharmony: A new tool for harmonizing volumetric MRI data from unseen scanners,” *NeuroImage*, vol. 220, p. 117127, Oct. 2020, doi: 10.1016/j.neuroimage.2020.117127.
- [2] B. E. Dewey *et al.*, “DeepHarmony: A deep learning approach to contrast harmonization across scanner changes,” *Magn. Reson. Imaging*, vol. 64, pp. 160–170, Dec. 2019, doi: 10.1016/j.mri.2019.05.041.
- [3] Q. Tong *et al.*, “A deep learning–based method for improving reliability of multicenter diffusion kurtosis imaging with varied acquisition protocols,” *Magn. Reson. Imaging*, vol. 73, pp. 31–44, Nov. 2020, doi: 10.1016/j.mri.2020.08.001.
- [4] S. Koppers, L. Bloy, J. I. Berman, C. M. W. Tax, J. C. Edgar, and D. Merhof, “Spherical Harmonic Residual Network for Diffusion Signal Harmonization,” in *Computational Diffusion MRI*, Cham, 2019, pp. 173–182. doi: 10.1007/978-3-030-05831-9\_14.
- [5] S. St-Jean, M. A. Viergever, and A. Leemans, “Harmonization of diffusion MRI data sets with adaptive dictionary learning,” *Hum. Brain Mapp.*, vol. 41, no. 16, pp. 4478–4499, 2020, doi: <https://doi.org/10.1002/hbm.25117>.
- [6] F. Zhao *et al.*, “Harmonization of Infant Cortical Thickness Using Surface-to-Surface Cycle-Consistent Adversarial Networks,” *Med. Image Comput. Comput.-Assist. Interv. MICCAI Int. Conf. Med. Image Comput. Comput.-Assist. Interv.*, vol. 11767, pp. 475–483, Oct. 2019, doi: 10.1007/978-3-030-32251-9\_52.
- [7] M. Ren, N. Dey, J. Fishbaugh, and G. Gerig, “Segmentation-Renormalized Deep Feature Modulation for Unpaired Image Harmonization,” *IEEE Trans. Med. Imaging*, vol. 40, no. 6, pp. 1519–1530, Jun. 2021, doi: 10.1109/TMI.2021.3059726.
- [8] R. Robinson *et al.*, “Image-Level Harmonization of Multi-site Data Using Image-and-Spatial Transformer Networks,” in *Medical Image Computing and Computer Assisted Intervention – MICCAI 2020*, Cham, 2020, pp. 710–719. doi: 10.1007/978-3-030-59728-3\_69.
- [9] B. E. Dewey *et al.*, “A Disentangled Latent Space for Cross-Site MRI Harmonization,” in *Medical Image Computing and Computer Assisted Intervention – MICCAI 2020*, Cham, 2020, pp. 720–729. doi: 10.1007/978-3-030-59728-3\_70.

- [10] L. Zuo *et al.*, “Information-Based Disentangled Representation Learning for Unsupervised MR Harmonization,” in *Information Processing in Medical Imaging*, Cham, 2021, pp. 346–359. doi: 10.1007/978-3-030-78191-0\_27.
- [11] L. Zuo *et al.*, “Unsupervised MR harmonization by learning disentangled representations using information bottleneck theory,” *NeuroImage*, vol. 243, p. 118569, Nov. 2021, doi: 10.1016/j.neuroimage.2021.118569.
- [12] Y. Gao, Y. Liu, Y. Wang, Z. Shi, and J. Yu, “A Universal Intensity Standardization Method Based on a Many-to-One Weak-Paired Cycle Generative Adversarial Network for Magnetic Resonance Images,” *IEEE Trans. Med. Imaging*, vol. 38, no. 9, pp. 2059–2069, Sep. 2019, doi: 10.1109/TMI.2019.2894692.
- [13] M. Liu *et al.*, “Style Transfer Using Generative Adversarial Networks for Multi-site MRI Harmonization,” in *Medical Image Computing and Computer Assisted Intervention – MICCAI 2021*, Cham, 2021, pp. 313–322. doi: 10.1007/978-3-030-87199-4\_30.
- [14] L. Weninger, M. Ahmad, and D. Merhof, “From Supervised to Unsupervised Harmonization of Diffusion Mri Acquisitions,” in *2022 IEEE 19th International Symposium on Biomedical Imaging (ISBI)*, Mar. 2022, pp. 1–5. doi: 10.1109/ISBI52829.2022.9761445.
- [15] M. E. Torbati, D. L. Tudorascu, D. S. Minhas, P. Maillard, C. S. DeCarli, and S. Jae Hwang, “Multi-scanner Harmonization of Paired Neuroimaging Data via Structure Preserving Embedding Learning,” in *2021 IEEE/CVF International Conference on Computer Vision Workshops (ICCVW)*, Montreal, BC, Canada, Oct. 2021, pp. 3277–3286. doi: 10.1109/ICCVW54120.2021.00367.
- [16] D. Tian *et al.*, “A deep learning-based multisite neuroimage harmonization framework established with a traveling-subject dataset,” *NeuroImage*, p. 119297, May 2022, doi: 10.1016/j.neuroimage.2022.119297.
- [17] K. Fatania *et al.*, “Harmonisation of scanner-dependent contrast variations in magnetic resonance imaging for radiation oncology, using style-blind auto-encoders,” *Phys. Imaging Radiat. Oncol.*, vol. 22, pp. 115–122, Apr. 2022, doi: 10.1016/j.phro.2022.05.005.
- [18] H. Arai, Y. Onga, K. Ikuta, Y. Chayama, H. Iyatomi, and K. Oishi, “Disease-Oriented Image Embedding With Pseudo-Scanner Standardization for Content-Based Image Retrieval on 3D Brain MRI,” *IEEE Access*, vol. 9, pp. 165326–165340, 2021, doi: 10.1109/ACCESS.2021.3129105.
- [19] J. Zhong *et al.*, “Inter-site harmonization based on dual generative adversarial networks for diffusion tensor imaging: application to neonatal white matter development,” *Biomed. Eng. OnLine*, vol. 19, no. 1, p. 4, Jan. 2020, doi: 10.1186/s12938-020-0748-9.
- [20] D. Moyer, G. Ver Steeg, C. M. W. Tax, and P. M. Thompson, “Scanner invariant representations for diffusion MRI harmonization,” *Magn. Reson. Med.*, vol. 84, no. 4, pp. 2174–2189, 2020, doi: 10.1002/mrm.28243.
- [21] H. Mirzaalian *et al.*, “Multi-site harmonization of diffusion MRI data in a registration framework,” *Brain Imaging Behav.*, vol. 12, no. 1, pp. 284–295, Feb. 2018, doi: 10.1007/s11682-016-9670-y.



- [22] H. Guan, Y. Liu, E. Yang, P.-T. Yap, D. Shen, and M. Liu, "Multi-site MRI harmonization via attention-guided deep domain adaptation for brain disorder identification," *Med. Image Anal.*, vol. 71, p. 102076, Jul. 2021, doi: 10.1016/j.media.2021.102076.
- [23] N. K. Dinsdale, M. Jenkinson, and A. I. L. Namburete, "Deep learning-based unlearning of dataset bias for MRI harmonisation and confound removal," *NeuroImage*, vol. 228, p. 117689, Mar. 2021, doi: 10.1016/j.neuroimage.2020.117689.
- [24] M. Orbes-Arteaga *et al.*, "Multi-domain Adaptation in Brain MRI Through Paired Consistency and Adversarial Learning," *Domain Adapt. Represent. Transf. Med. Image Learn. Labels Imperfect Data First MICCAI Workshop DART 2019 First Int. Workshop MIL3ID 2019 Shenzhen Held Conjunction MICCAI 20*, vol. 2019, pp. 54–62, 2019, doi: 10.1007/978-3-030-33391-1\_7.
- [25] A. Ackaouy, N. Courty, E. Vallée, O. Commowick, C. Barillot, and F. Galassi, "Unsupervised Domain Adaptation With Optimal Transport in Multi-Site Segmentation of Multiple Sclerosis Lesions From MRI Data," *Front. Comput. Neurosci.*, vol. 14, p. 19, Mar. 2020, doi: 10.3389/fncom.2020.00019.
- [26] J. Zhang, M. Liu, Y. Pan, and D. Shen, "Unsupervised Conditional Consensus Adversarial Network for Brain Disease Identification with Structural MRI," in *Machine Learning in Medical Imaging*, Cham, 2019, pp. 391–399. doi: 10.1007/978-3-030-32692-0\_45.
- [27] M. Yousefnezhad, A. Selvitella, D. Zhang, A. J. Greenshaw, and R. Greiner, "Shared space transfer learning for analyzing multi-site fMRI data," in *Proceedings of the 34th International Conference on Neural Information Processing Systems*, Red Hook, NY, USA, Dec. 2020, pp. 15990–16000.
- [28] M. Wang, D. Zhang, J. Huang, P.-T. Yap, D. Shen, and M. Liu, "Identifying Autism Spectrum Disorder With Multi-Site fMRI via Low-Rank Domain Adaptation," *IEEE Trans. Med. Imaging*, vol. 39, no. 3, pp. 644–655, Mar. 2020, doi: 10.1109/TMI.2019.2933160.
- [29] N. Wang, D. Yao, L. Ma, and M. Liu, "Multi-site clustering and nested feature extraction for identifying autism spectrum disorder with resting-state fMRI," *Med. Image Anal.*, vol. 75, p. 102279, Jan. 2022, doi: 10.1016/j.media.2021.102279.
- [30] P.-L. Delisle, B. Anctil-Robitaille, C. Desrosiers, and H. Lombaert, "Realistic image normalization for multi-Domain segmentation," *Med. Image Anal.*, vol. 74, p. 102191, Dec. 2021, doi: 10.1016/j.media.2021.102191.
- [31] Y.-L. Huang, W.-T. Hsieh, H.-C. Yang, and C.-C. Lee, "Conditional Domain Adversarial Transfer for Robust Cross-Site ADHD Classification Using Functional MRI," in *ICASSP 2020 - 2020 IEEE International Conference on Acoustics, Speech and Signal Processing (ICASSP)*, May 2020, pp. 1190–1194. doi: 10.1109/ICASSP40776.2020.9054606.
- [32] G. C Monte-Rubio *et al.*, "Parameters from site classification to harmonize MRI clinical studies: Application to a multi-site Parkinson's disease dataset," *Hum. Brain Mapp.*, Mar. 2022, doi: 10.1002/hbm.25838.
- [33] C.-L. Chen *et al.*, "Generalization of diffusion magnetic resonance imaging-based brain age prediction model through transfer learning," *NeuroImage*, vol. 217, p. 116831, Aug. 2020, doi: 10.1016/j.neuroimage.2020.116831.

- [34] C. Wachinger and M. Reuter, "Domain Adaptation for Alzheimer's Disease Diagnostics," *NeuroImage*, vol. 139, pp. 470–479, Oct. 2016, doi: 10.1016/j.neuroimage.2016.05.053.
- [35] M. Ghafoorian *et al.*, "Transfer Learning for Domain Adaptation in MRI: Application in Brain Lesion Segmentation," in *Medical Image Computing and Computer Assisted Intervention – MICCAI 2017*, Cham, 2017, pp. 516–524. doi: 10.1007/978-3-319-66179-7\_59.
- [36] E. Balboni *et al.*, "The impact of transfer learning on 3D deep learning convolutional neural network segmentation of the hippocampus in mild cognitive impairment and Alzheimer disease subjects," *Hum. Brain Mapp.*, Apr. 2022, doi: 10.1002/hbm.25858.
- [37] C. Shi, X. Xin, and J. Zhang, "Domain Adaptation Using a Three-Way Decision Improves the Identification of Autism Patients from Multisite fMRI Data," *Brain Sci.*, vol. 11, no. 5, Art. no. 5, May 2021, doi: 10.3390/brainsci11050603.
- [38] A. van Opbroek, M. A. Ikram, M. W. Vernooij, and M. de Bruijne, "Transfer Learning Improves Supervised Image Segmentation Across Imaging Protocols," *IEEE Trans. Med. Imaging*, vol. 34, no. 5, pp. 1018–1030, 2015, doi: 10.1109/TMI.2014.2366792.
- [39] R. Wang, P. Chaudhari, and C. Davatzikos, "Embracing the disharmony in medical imaging: A Simple and effective framework for domain adaptation," *Med. Image Anal.*, vol. 76, p. 102309, Feb. 2022, doi: 10.1016/j.media.2021.102309.
- [40] C. Shi, X. Xin, and J. Zhang, "Domain adaptation based on rough adjoint inconsistency and optimal transport for identifying autistic patients," *Comput. Methods Programs Biomed.*, vol. 215, p. 106615, Mar. 2022, doi: 10.1016/j.cmpb.2021.106615.
- [41] A. van Opbroek, M. W. Vernooij, M. A. Ikram, and M. de Bruijne, "Weighting training images by maximizing distribution similarity for supervised segmentation across scanners," *Med. Image Anal.*, vol. 24, no. 1, pp. 245–254, Aug. 2015, doi: 10.1016/j.media.2015.06.010.
- [42] Q. Ma *et al.*, "Classification of multi-site MR images in the presence of heterogeneity using multi-task learning," *NeuroImage Clin.*, vol. 19, pp. 476–486, Jan. 2018, doi: 10.1016/j.nicl.2018.04.037.
